# Supplementary material for: Persistent humoral immunity in children and adolescents throughout the COVID-19 pandemic (June 2020 to July 2022): a prospective school-based cohort study (Ciao Corona) in Switzerland
Source: bioRxiv or medRxiv preprint supplement (doi:10.1101/2023.05.08.23289517), 2023-05-10
Supplement: Supplementary file [file media-1.pdf]

1 [Supplementary Material](#)

2 **Supplementary Table 1: Chronic condition in children and adolescents.** Chronic disease  
3 assessed via questionnaires. In this table are listed all the chronic conditions reported by the  
4 children and adolescents or their proxy.

|                                                                                                                                            |
|--------------------------------------------------------------------------------------------------------------------------------------------|
| Asthma                                                                                                                                     |
| hay fever                                                                                                                                  |
| celiac disease                                                                                                                             |
| lactose intolerance                                                                                                                        |
| allergies (other than hay fever)                                                                                                           |
| neurodermitis                                                                                                                              |
| diabetes mellitus                                                                                                                          |
| inflammatory bowel disease                                                                                                                 |
| hypertension                                                                                                                               |
| arthritis                                                                                                                                  |
| other chronic diseases potentially affecting the immune response (Neutropenia, PFAPA-Syndrome, renal failure, cystic fibrosis, bronchitis) |

5  
6

7 **Supplementary Table 2: Overall seroprevalence and seroprevalence split in  $\geq 12$  and  $< 12$ -**  
8 **year-old children and adolescents.** This table illustrates the overall seroprevalence and  
9 seroprevalence divided according to age ( $< 12$  years and  $\geq 12$  years) for all five testing rounds.  
10 The proportion of vaccinated children and adolescents per testing round is also indicated.

|     | Timeframe of testing            | T1<br>Jun/July 2020 | T2<br>Nov/Dec 2020 | T3<br>Mar/Apr 2021 | T4<br>Oct/Nov 2021 | T5<br>Jun/Jul 2022 |
|-----|---------------------------------|---------------------|--------------------|--------------------|--------------------|--------------------|
| All | Seroprevalence:<br>Unvaccinated | 3.0%                | 5.6%               | 18.4%              | 31.3%              | 95.8%              |

|                  |                        |                       |                       |                          |                          |                          |
|------------------|------------------------|-----------------------|-----------------------|--------------------------|--------------------------|--------------------------|
|                  |                        | (1.3% - 4.5%)         | (3.6% - 7.6%)         | (15.2% - 21.9%)          | (27.5% - 35.9%)          | (93.1% - 97.8%)          |
|                  | Vaccinated ± infected  | -                     | -                     | -                        | 46.4%<br>(42.6% - 51.0%) | 96.9%<br>(95.2% - 98.1%) |
|                  | % vaccinated           | -                     | -                     | -                        | 25.5%                    | 43.4%                    |
| <b>&lt;12yrs</b> | <b>Seroprevalence:</b> |                       |                       |                          |                          |                          |
|                  | Unvaccinated           | 3.0%<br>(1.4% - 4.6%) | 5.6%<br>(3.5% - 7.8%) | 19.7%<br>(16.0% - 24.0%) | 28.4%<br>(24.2% - 33.2%) | 95.1%<br>(92.2% - 97.5%) |
|                  | Vaccinated ± infected  | -                     | -                     | -                        | -                        | 95.7%<br>(93.4% - 97.4%) |
|                  | % vaccinated           | -                     | -                     | -                        | 0                        | 28.0 %                   |
| <b>≥12yrs</b>    | <b>Seroprevalence:</b> |                       |                       |                          |                          |                          |
|                  | Unvaccinated           | 2.9%<br>(0.9% -4.9%)  | 5.6%<br>(3.2% - 7.9%) | 16.8%<br>(13.5% - 20.1%) | 40.3%<br>(34.2% - 47.0%) | 97.2%<br>(94.7% - 98.7%) |
|                  | Vaccinated ± infected  | -                     | -                     | -                        | 69.4%<br>(64.0% - 75.4%) | 98.4%<br>(97.3% - 99.2%) |
|                  | % vaccinated           | -                     | -                     | -                        | 51.2%                    | 57.6%                    |

11

12

13 **Supplementary Table 3: Anti-spike IgG MFI ratios and neutralising activity (IC50) at T5.** This

14 table provides detailed anti-spike IgG titres (MFI ratio, positive values defined by a cutoff of 6

15 or higher) and neutralising activity (measured by the half maximal inhibitory concentration

16 IC50, with positive values defined by a cutoff of 50 or higher) in children and adolescents from

17 the longitudinal cohort. We divided individuals based on their serology at T5 in Hybrid,  
 18 Vaccinated and Infected.

19

| N   | T5 Group   | Anti-spike IgG titres (MFI Ratio) Median and IQR | Anti-Wildtype neutralising activity (IC50) Median (IQR) | Anti-Delta neutralising activity (IC50) Median (IQR) | Anti-Omicron neutralising activity (IC50) Median (IQR) | % of Individuals above threshold for Anti-Wildtype (95% CI) | % of Individuals above threshold for Anti-Delta (95% CI) | % of Individuals above threshold for Anti-Omicron (95% CI) |
|-----|------------|--------------------------------------------------|---------------------------------------------------------|------------------------------------------------------|--------------------------------------------------------|-------------------------------------------------------------|----------------------------------------------------------|------------------------------------------------------------|
| 180 | Hybrid     | 136.2 (121.9-154.3)                              | 591.2 (355.4-1055.2)                                    | 316.9 (189.1-574.1)                                  | 220 (147.7-382.9)                                      | 98.3 (95.2-99.4)                                            | 96.1 (92.2-98.1)                                         | 98.9 (96.0-99.7)                                           |
| 158 | Vaccinated | 127.6 (114.1-151)                                | 312.8 (173-689.4)                                       | 158.4 (88.9-337.4)                                   | 133.2 (60.5-214.4)                                     | 96.2 (92.0-98.2)                                            | 86.7 (80.5-91.1)                                         | 81.6 (74.9-86.9)                                           |
| 353 | Infected   | 54.8 (22.8-89.8)                                 | 59.2 (16.7-125.9)                                       | 42.5 (11.9-88.3)                                     | 69.5 (34.2-127.4)                                      | 54.4 (49.2-59.5)                                            | 45.6 (40.5-50.8)                                         | 64.9 (59.8-69.7)                                           |

20

21

22 **Supplementary Table 4: Anti-spike IgG MFI ratios between T4 (Nov/Dec 2021) and T5**  
 23 **(Jun/Jul 2022).** This table provides the anti-spike IgG MFI ratio (median and interquartile  
 24 range) shown in the boxplot (Figure 4) for all different group combinations.

| N   | T4 Group      | T5 Group      | T4: Median (IQR) MFI ratio | T5: Median (IQR) MFI ratio |
|-----|---------------|---------------|----------------------------|----------------------------|
| 38  | T4 Hybrid     | T5 Hybrid     | 107.2 (88.8-113.1)         | 132.8 (121.6-145.9)        |
| 60  | T4 Vaccinated | T5 Hybrid     | 103 (80.6-119.8)           | 135.1 (121.6-155.3)        |
| 84  | T4 Vaccinated | T5 Vaccinated | 111.2 (89.3-122.6)         | 128.4 (118.7-155.1)        |
| 33  | T4 Infected   | T5 Hybrid     | 35.8 (24.8-48.5)           | 150.5 (130.4-158.4)        |
| 143 | T4 Infected   | T5 Infected   | 36.5 (24.9-50.2)           | 86.4 (64.2-117.8)          |
| 49  | T4 Negative   | T5 Hybrid     | 1 (1-1)                    | 136.2 (119.1-149.2)        |
| 74  | T4 Negative   | T5 Vaccinated | 1 (1-1)                    | 125.4 (94.3-141.4)         |
| 210 | T4 Negative   | T5 Infected   | 1 (1-1.2)                  | 27.9 (15.9-56.4)           |

25

26

27 **Supplementary Table 5: Anti-spike IgG MFI ratio converted to U/ml for Roche Elecsys anti-**  
 28 **spike IgG (WHO measure) between T4 (Nov/Dec 2021) and T5 (Jun/Jul 2022).** This table  
 29 provides the MFI ratio converted to U/ml for Roche Elecsys anti-spike IgG (WHO measure)  
 30 shown in the boxplot (Supplementary Figure 3). We converted the MFI values to U/ml, by

31 using the Elecsys Anti-SARS-CoV2 immunoassay developed by Roche, for the purpose of  
 32 interpretation. The Department of Clinical Immunology & Allergy of the University Hospital of  
 33 Lausanne used population based samples to provide the conversion formula of Roche anti-  
 34 spike IgG =  $10^{(-0.6108069 + 2.0072882 \times \log_{10}(\text{MFI} + 1))}$ .

| N   | T4 Group      | T5 Group      | T4: Median (IQR) U/ml  | T5: Median (IQR) U/ml  |
|-----|---------------|---------------|------------------------|------------------------|
| 38  | T4 Hybrid     | T5 Hybrid     | 2968.1 (2044.4-3303.3) | 4542.3 (3812.9-5479.4) |
| 60  | T4 Vaccinated | T5 Hybrid     | 2744 (1685.8-3706.2)   | 4700.7 (3815.7-6212.1) |
| 84  | T4 Vaccinated | T5 Vaccinated | 3192.4 (2064.5-3875.3) | 4250.6 (3636.7-6190.2) |
| 33  | T4 Infected   | T5 Hybrid     | 340.6 (167-617.7)      | 5833.2 (4383.5-6459.8) |
| 143 | T4 Infected   | T5 Infected   | 353.8 (167.7-662.3)    | 1933.6 (1075.4-3577.5) |
| 49  | T4 Negative   | T5 Hybrid     | 1 (1-1)                | 4780.6 (3659.6-5733.2) |
| 74  | T4 Negative   | T5 Vaccinated | 1 (1-1)                | 4058.9 (2303.2-5151.2) |
| 210 | T4 Negative   | T5 Infected   | 1 (1-1.2)              | 209 (71.6-832.2)       |

35

36

37 **Supplementary Table 6: Proportion of children and adolescents with reinfection between**  
 38 **T4 (Nov/Dec 2021) and T5 (Jun/Jul 2022).** This table shows the proportion of children and  
 39 adolescents with first SARS-CoV-2 infection before T4 (Nov/Dec 2021) and reinfection  
 40 between T4 (Nov/Dec 2021) and T5 (Jun/Jul 2022). We divided children and adolescents into  
 41 unvaccinated, recent vaccination (latest vaccination between T4 and T5) and older infection  
 42 (latest vaccination before T4). In these three groups we calculated the proportion of children  
 43 and adolescents experiencing reinfection by looking at the presence of anti-nucleocapsid IgG  
 44 as well as 25% increase and/or decrease.

|                                     | Unvaccinated<br>N=314 |                 | Recent vaccination<br>N=220 |                 | Older vaccination<br>N=206 |                 |
|-------------------------------------|-----------------------|-----------------|-----------------------------|-----------------|----------------------------|-----------------|
|                                     | Anti-N IgG<br>+       | Anti-N IgG<br>- | Anti-N IgG<br>+             | Anti-N IgG<br>- | Anti-N IgG<br>+            | Anti-N IgG<br>- |
| Anti-nucleocapsid<br>IgG positivity |                       |                 |                             |                 |                            |                 |
| N                                   | 231/314               | 31/314          | 57/220                      | 100/220         | 58/206                     | 53/206          |
| ≥25% titre increase                 | (73.6%)               | (9.9%)          | (25.9%)                     | (45.5%)         | (28.2%)                    | (25.7%)         |

|                                                              |                  |                  |                   |                   |                   |                  |
|--------------------------------------------------------------|------------------|------------------|-------------------|-------------------|-------------------|------------------|
| N<br>between<br><25% titre increase &<br><25% titre decrease | 17/314<br>(5.4%) | 23/314<br>(7.3%) | 23/220<br>(10.5%) | 34/220<br>(15.5%) | 42/206<br>(20.4%) | 40/206<br>19.4%  |
| N<br>≥25% titre decrease                                     | 4/314<br>(1.3%)  | 8/314<br>(2.5)   | 1/220<br>(0.4%)   | 5/220<br>(2.3%)   | 2/206<br>(0.9%)   | 11/206<br>(5.4%) |

45

46

47 **Supplementary Table 7: Neutralising activity between T4 (Nov/Dec 2021) and T5 (Jun/Jul**

48 **2022).** This figure shows the development of neutralising antibodies against different SARS-

49 CoV-2 variants between T4 (Nov/Dec 2021) and T5 (Jun/Jul 2022). We again separated

50 participants into the four different groups according to their serology at T4 and exposure

51 status (i.e., seronegative, only infected, only vaccinated, or with hybrid immunity) and

52 evaluated neutralising activity against Wildtype, Delta, and Omicron. We calculated medians

53 (with inter quartile ranges (IQR)) and proportion of children and adolescents with neutralising

54 activity, measured by the half maximal inhibitory concentration (IC50) with positive or

55 negative results defined by a cutoff value of 50 or higher.

56

| N  | Variant of concern | T4 Group      | T5 Group      | T4: Median (IQR)        | T5: Median (IQR)         | T4: % of Individuals above threshold (%) | T5: % of Individuals above threshold (%) |
|----|--------------------|---------------|---------------|-------------------------|--------------------------|------------------------------------------|------------------------------------------|
| 38 | Wildtype           | T4 Hybrid     | T5 Hybrid     | 913.9<br>(476.9-2287.4) | 672.5<br>(339.1-1015.2)  | 100<br>(90.8-100)                        | 100<br>(90.8-100)                        |
| 60 | Wildtype           | T4 Vaccinated | T5 Hybrid     | 568.5<br>(324.4-780.8)  | 1082.9<br>(639.9-2083.3) | 100<br>(94.0-100)                        | 100<br>(94.0-100)                        |
| 84 | Wildtype           | T4 Vaccinated | T5 Vaccinated | 405.2<br>(254.9-569.3)  | 578.1<br>(319.1-929.3)   | 98.8<br>(93.6-99.8)                      | 100<br>(95.6-100)                        |
| 33 | Wildtype           | T4 Infected   | T5 Hybrid     | 51.9<br>(34-82.2)       | 505.8<br>(372.9-687.8)   | 51.5<br>(35.2-67.5)                      | 100<br>(90.0-100)                        |

|     |          |               |               |                        |                         |                     |                     |
|-----|----------|---------------|---------------|------------------------|-------------------------|---------------------|---------------------|
| 143 | Wildtype | T4 Infected   | T5 Infected   | 59.7<br>(35.8-89.4)    | 125.9<br>(81.6-206.3)   | 58<br>(49.8-65.8)   | 90.9<br>(85.1-94.6) |
| 49  | Wildtype | T4 Negative   | T5 Hybrid     | 0                      | 354<br>(205.4-494.1)    | 0<br>(0-7.3)        | 93.9<br>(83.5-97.9) |
| 74  | Wildtype | T4 Negative   | T5 Vaccinated | 0                      | 207.3<br>(119-281.8)    | 0<br>(0-4.9)        | 91.9<br>(83.4-96.2) |
| 210 | Wildtype | T4 Negative   | T5 Infected   | 0                      | 21.5<br>(11.1-59.2)     | 0<br>(0-1.8)        | 29.5<br>(23.8-36.0) |
| 38  | Delta    | T4 Hybrid     | T5 Hybrid     | 395.3<br>(219.4-919.9) | 318.6<br>(187.4-547.7)  | 97.4<br>(86.5-99.5) | 100<br>(90.8-100)   |
| 60  | Delta    | T4 Vaccinated | T5 Hybrid     | 211.3<br>(129.2-337.5) | 610.2<br>(377.7-1143.4) | 100<br>(94.0-100)   | 100<br>(94.0-100)   |
| 84  | Delta    | T4 Vaccinated | T5 Vaccinated | 170.5<br>(118.4-240.4) | 256.9<br>(153-490.5)    | 96.4<br>(90.0-98.8) | 94.0<br>(86.8-97.4) |
| 33  | Delta    | T4 Infected   | T5 Hybrid     | 31.7<br>(21.2-49.7)    | 249<br>(187.4-324.7)    | 24.2<br>(12.8-41.0) | 100<br>(90.0-100)   |
| 143 | Delta    | T4 Infected   | T5 Infected   | 33.9<br>(22-47.7)      | 88.3<br>(56.6-141.3)    | 23.1<br>(16.9-30.6) | 79.7<br>(72.4-85.5) |
| 49  | Delta    | T4 Negative   | T5 Hybrid     | 0                      | 189.8<br>(136.1-308.7)  | 0<br>(0-7.3)        | 85.7<br>(73.3-92.9) |
| 74  | Delta    | T4 Negative   | T5 Vaccinated | 0                      | 112.8<br>(55.2-150.1)   | 0<br>(0-4.9)        | 78.4<br>(67.8-86.2) |
| 210 | Delta    | T4 Negative   | T5 Infected   | 0                      | 16<br>(8.3-45.8)        | 0<br>(0-1.8)        | 22.4<br>(17.3-28.5) |
| 38  | Omicron  | T4 Hybrid     | T5 Hybrid     | 191<br>(105.2-630.5)   | 203.3<br>(124.7-288.8)  | 92.1<br>(79.2-97.3) | 100<br>(90.8-100)   |
| 60  | Omicron  | T4 Vaccinated | T5 Hybrid     | 95<br>(60.5-143.9)     | 421.9<br>(284.1-656.5)  | 81.7<br>(70.1-89.4) | 100<br>(94.0-100)   |
| 84  | Omicron  | T4 Vaccinated | T5 Vaccinated | 70.1<br>(49.8-95)      | 191.7<br>(79.5-329.9)   | 75<br>(64.8-83.0)   | 84.5<br>(75.3-90.7) |
| 33  | Omicron  | T4 Infected   | T5 Hybrid     | 0                      | 166.2<br>(124.8-206.1)  | 0<br>(0-10.4)       | 100<br>(90.0-100)   |
| 143 | Omicron  | T4 Infected   | T5 Infected   | 0<br>(0-13)            | 85.2<br>(54.2-126.8)    | 1.4<br>(0.4-5.0)    | 78.3<br>(70.9-84.3) |
| 49  | Omicron  | T4 Negative   | T5 Hybrid     | 0                      | 176.9<br>(125.9-252.1)  | 0<br>(0-7.3)        | 95.9<br>(86.3-98.9) |
| 74  | Omicron  | T4 Negative   | T5 Vaccinated | 0                      | 89.6<br>(54.4-158.5)    | 0<br>(0-4.9)        | 78.4<br>(67.7-86.3) |
| 210 | Omicron  | T4 Negative   | T5 Infected   | 0                      | 57.3<br>(25.1-129.5)    | 0<br>(0-1.8)        | 55.7<br>(49.0-62.3) |

57

58

59

60 **Supplementary Figure 1: Heatmap for the longitudinal trajectory of MFI ratio converted to**  
61 **U/ml for Roche Elecsys anti-spike IgG (WHO measure) in children and adolescents over the**  
62 **entire study period.** Individual trajectories of anti-spike IgG of MFI ratio converted to U/ml for  
63 Roche Elecsys anti-spike IgG (WHO measure) over time separated by first incidence of  
64 seropositive result in children and adolescents (total n = 386). We excluded children and  
65 adolescents who never tested seropositive throughout all five testing rounds (n= 37) and  
66 children and adolescents who seroconverted between T4 (Nov/Dec 2021) and T5 (Jun/Jul  
67 2022) (n= 328). We converted the MFI values to U/ml, by using the Elecsys Anti-SARS-CoV2  
68 immunoassay developed by Roche, for the purpose of interpretation. The Department of  
69 Clinical Immunology & Allergy of the University Hospital of Lausanne used population based  
70 samples to provide the conversion formula Roche anti-spike IgG =  
71  $10^{(-0.6108069 + 2.0072882 \times \log_{10}(\text{MFI} + 1))}$ .

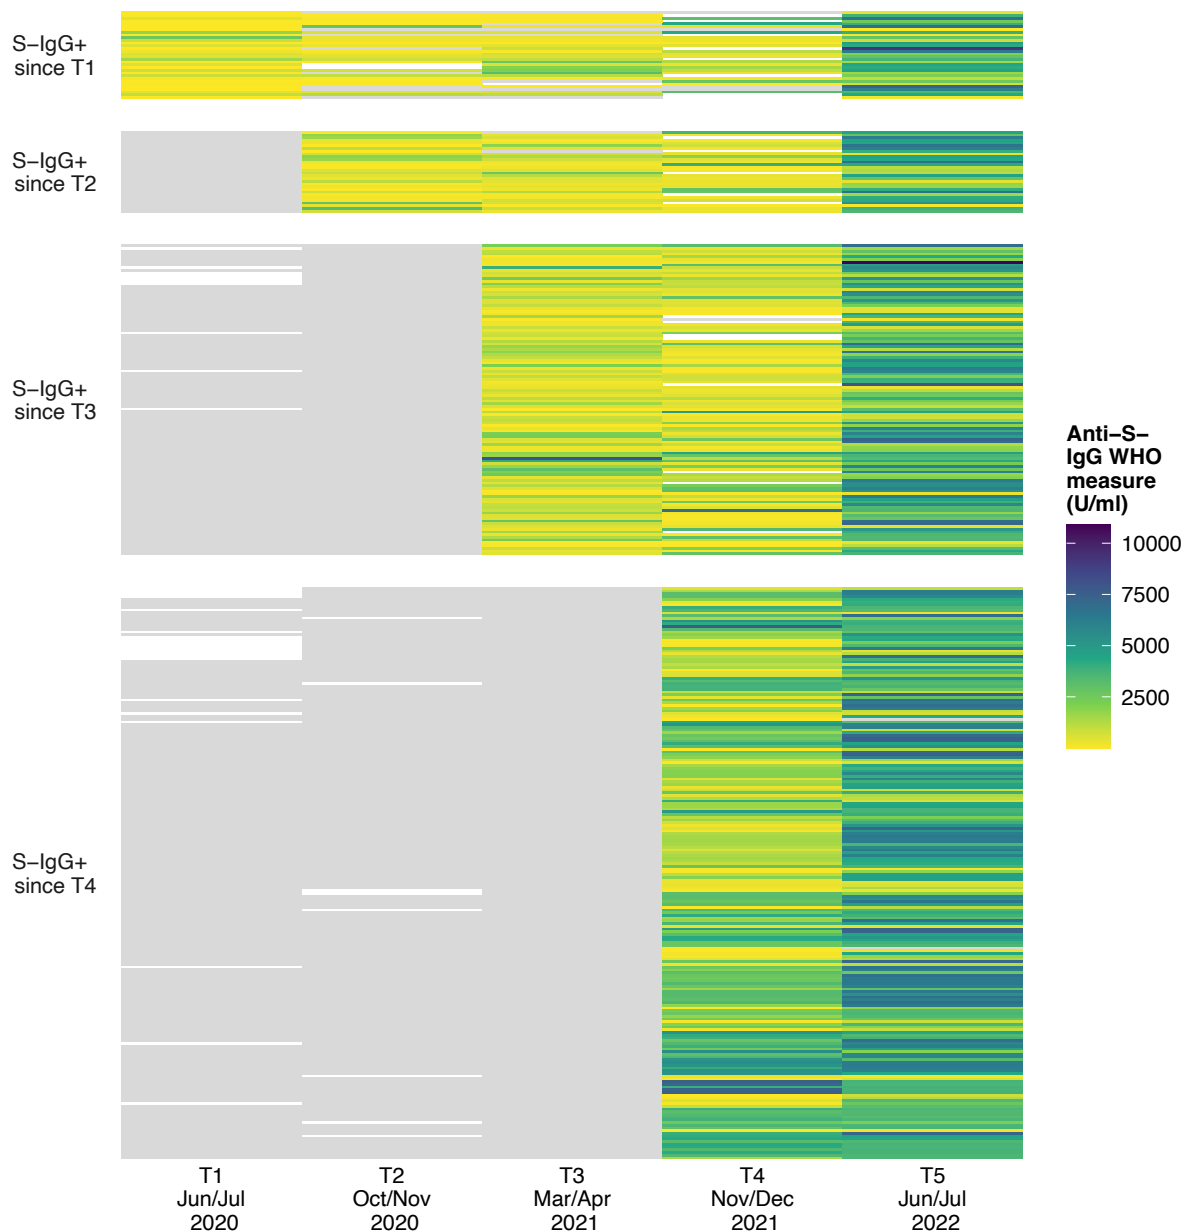

72

73

74 **Supplementary Figure 2: Half-life of anti-spike IgG antibodies.** For the primary analysis, we  
 75 calculated the waning of anti-spike IgG antibodies in children and adolescents considering a  
 76 time window of follow up of 365 days (total n= 114) **(A)**. For the sensitivity analysis we used a  
 77 shorter time window of 220 days (total n= 53) **(B)**. We followed up all children and adolescents  
 78 from the timepoint of seroconversion. We excluded individuals who never tested seropositive  
 79 for anti-spike IgG antibody, and who had no follow-up assessment after being tested



80 seropositive and those who got vaccinated. A mixed linear model was conducted to estimate  
81 the anti-spike IgG decay over time using a random intercept for participants.

82

83 (A)

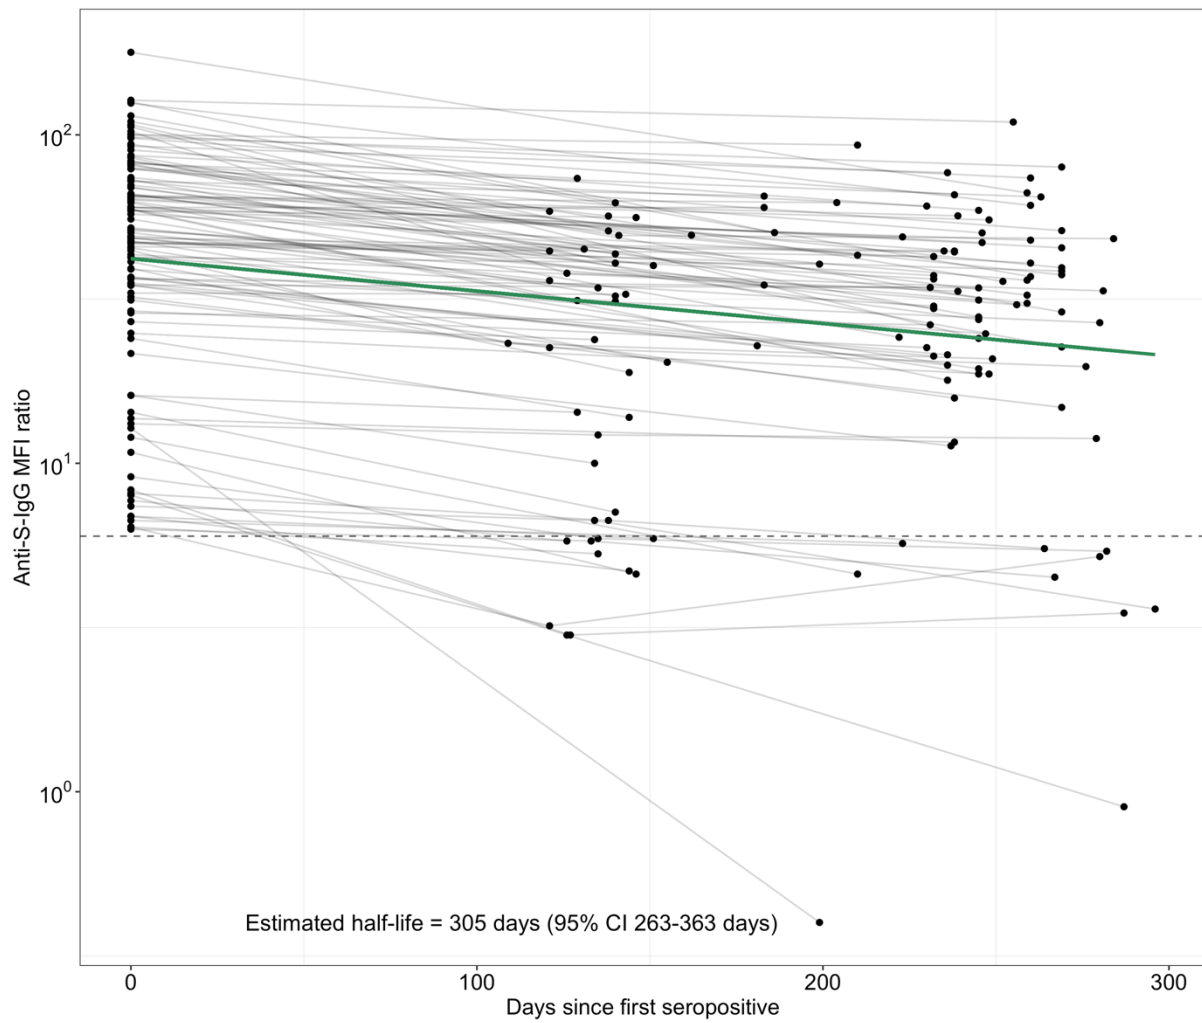

84

85 (B)

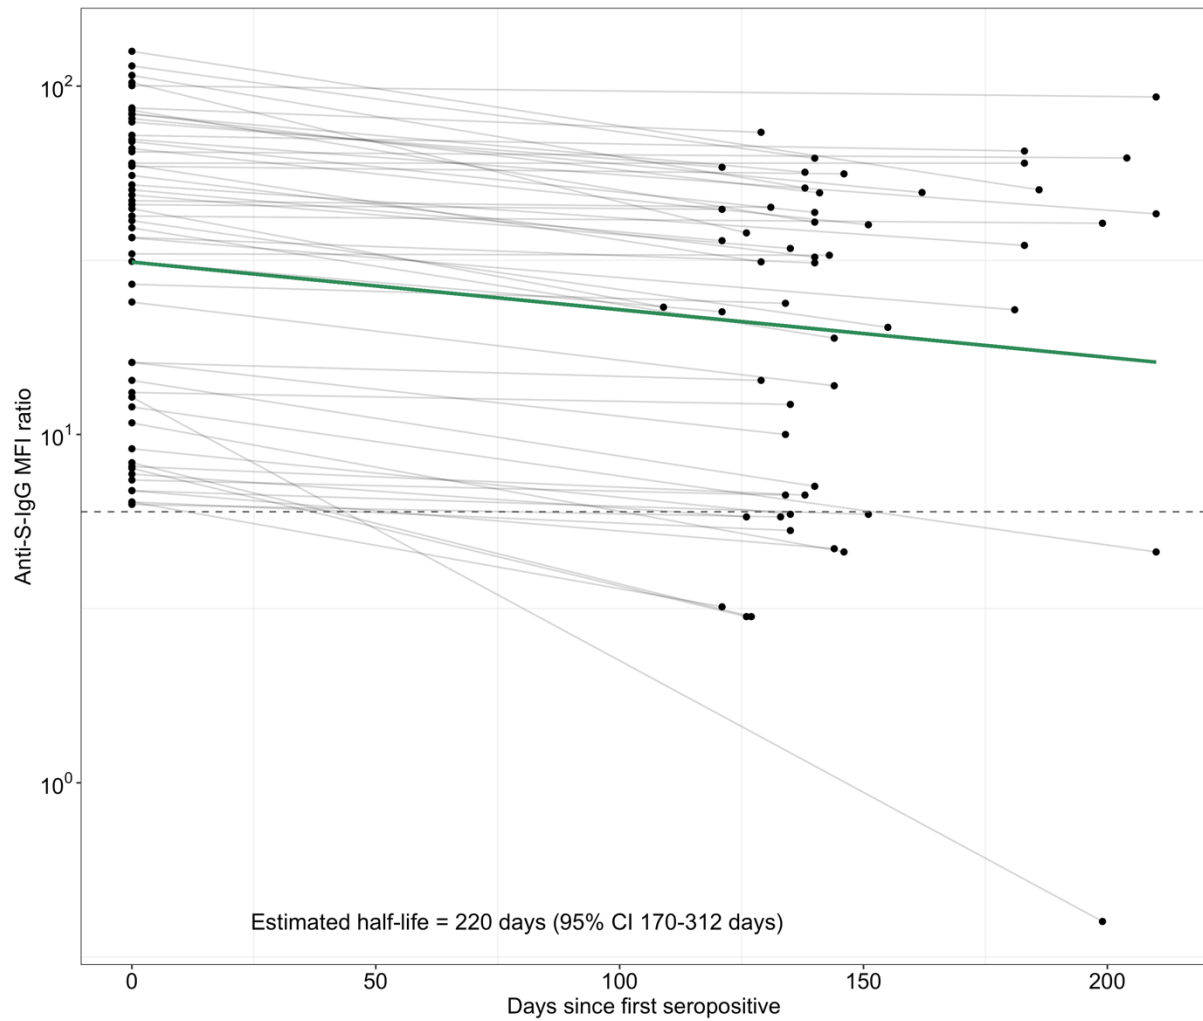

86

87

88

89 **Supplementary Figure 3: Evolution of anti-spike IgG of MFI ratio converted to U/ml for Roche**

90 **Elecsys anti-spike IgG (WHO measure) from T4 (Nov/Dec 2021) to T5 (Jun/Jul 2022).** This

91 figure shows the evolution of anti-spike IgG antibodies in groups of children and adolescents

92 separated by their serology and exposure status (i.e., seronegative, only infected, only

93 vaccinated, with hybrid immunity) at T4 (Nov/Dec 2021) and followed to T5 (Jun/Jul 2022).

94 We converted the MFI values to U/ml, by using the Elecsys Anti-SARS-CoV2 immunoassay

95 developed by Roche, for the purpose of interpretation. The Department of Clinical

96 Immunology & Allergy of the University Hospital of Lausanne used population based samples

97 to provide the conversion formula Roche anti-spike IgG =

98  $10^{(-0.6108069 + 2.0072882 \times \log_{10}(\text{MFI} + 1))}$ .

99

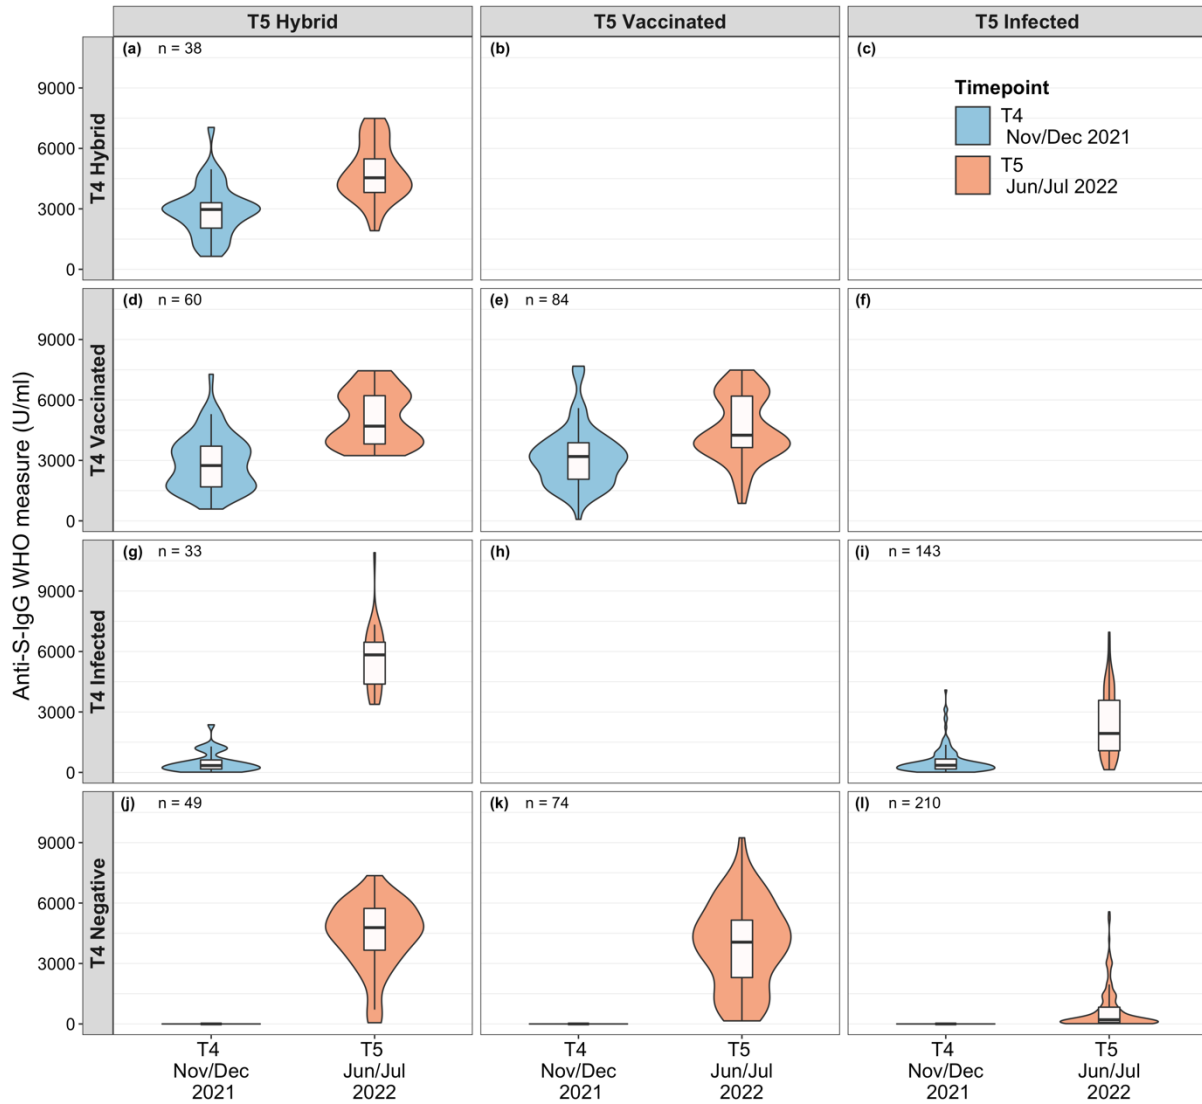

100

101

102
